# Supplementary material for: Current US prevalence of myocardial injury patterns and clinical outcomes among hospitalised patients with familial hypercholesterolaemia: insight from the National Inpatient Sample—a retrospective cohort study
Source: HighWire-hosted journal article supplement (doi:10.1136/bmjopen-2023-077839), 2024-05-01
Supplement: bmjopen-2023-077839supp001_data_supplement.pdf [file bmjopen-2023-077839supp001_data_supplement.pdf]

**Supplementary table 1:** Key ICD-10 and PCS code and corresponding diagnosis and procedures

| ICD-10 code                                                                                                                                                                                                                                                                                             | Diagnosis/procedure            |
|---------------------------------------------------------------------------------------------------------------------------------------------------------------------------------------------------------------------------------------------------------------------------------------------------------|--------------------------------|
| E78.01                                                                                                                                                                                                                                                                                                  | Familial hypercholesterolemia  |
| I21                                                                                                                                                                                                                                                                                                     | Acute myocardial infarction    |
| I21.0, I21.1, I21.2, I 21.3                                                                                                                                                                                                                                                                             | STEMI                          |
| I21.4                                                                                                                                                                                                                                                                                                   | NSTEMI                         |
| I21.A1                                                                                                                                                                                                                                                                                                  | Type 2 MI                      |
| I51.81                                                                                                                                                                                                                                                                                                  | Takotsubo                      |
| I21.A9, I21.9                                                                                                                                                                                                                                                                                           | Non-ischemic myocardial injury |
| I472                                                                                                                                                                                                                                                                                                    | Ventricular tachycardia        |
| 02H40KZ, 02H43KZ, 02H44KZ, 02H60KZ, 02H63KZ, 02H64KZ, 02H70KZ, 02H73KZ, 02H74KZ, 02HK0KZ, 02HK3KZ, 02HK4KZ, 02HL0KZ, 02HL3KZ, 02HL4KZ, 02HNOKZ, 02HN3KZ, 02HN4KZ, 0JH608Z, 0JH60FZ, 0JH638Z, 0JH63FZ, 0JH808Z, 0JH838Z, 02H73JZ, 02H70NZ, 02H70JZ, 02H64NZ, 02H64JZ, 02H63NZ, 02H63JZ, 02H60NZ, 02H60JZ | ICD implantation               |
| 5A2204Z                                                                                                                                                                                                                                                                                                 | Cardioversion                  |
| I462, I469                                                                                                                                                                                                                                                                                              | Cardiac arrest                 |
| R570, T8111XA, T8111XS                                                                                                                                                                                                                                                                                  | Cardiogenic shock              |
| 0270, 0271, 0273, 0272                                                                                                                                                                                                                                                                                  | PCI                            |
| 0210, 0212, 0211, 0214                                                                                                                                                                                                                                                                                  | CABG                           |
| 5A02110, 5A02210, 5A02216, 5A02116, 5A0221D, 5A1522G, 5A15223, 5A15A2H, 5A15A2F, 5A1522F, 5A1522H, 5A0211D, 5A15A2G, 02HA3RZ                                                                                                                                                                            | Mechanical circulatory device  |
| 5A1955Z, 5A1935Z, 5A1945Z                                                                                                                                                                                                                                                                               | Mechanical ventilation         |
